# Supplementary material for: A Novel Artificial MicroRNA Expressing AAV Vector for Phospholamban Silencing in Cardiomyocytes Improves Ca2+ Uptake into the Sarcoplasmic Reticulum
Source: PubMed Central journal article supplement (PMC3966758; doi:10.1371/journal.pone.0092188), 2014-03-26

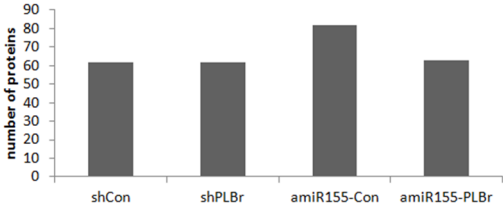

Supplement: pone.0092188.s001.pdf [file pone.0092188.s001.pdf]
