# Supplementary material for: A Novel Artificial MicroRNA Expressing AAV Vector for Phospholamban Silencing in Cardiomyocytes Improves Ca2+ Uptake into the Sarcoplasmic Reticulum
Source: PubMed Central journal article supplement (PMC3966758; doi:10.1371/journal.pone.0092188), 2014-03-26

Protein intensities shCon vs no add

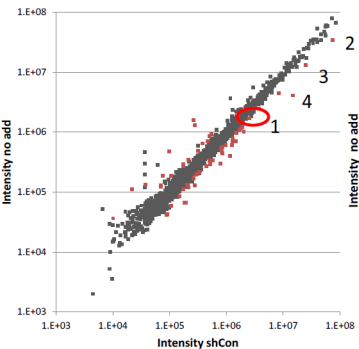

Protein intensities shPLBr vs no add

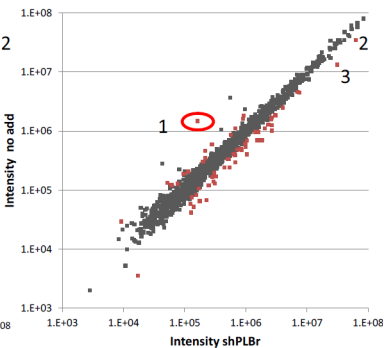

Protein intensities amiR155-Con vs no add

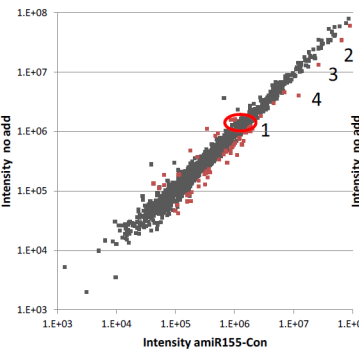

Protein intensities amiR155-PLBr vs no add

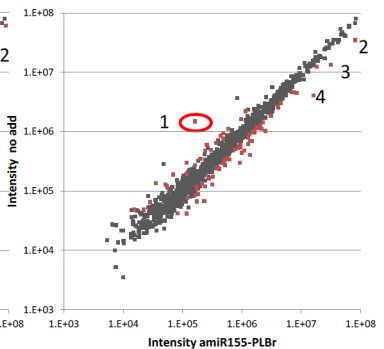

Supplement: pone.0092188.s002.pdf [file pone.0092188.s002.pdf]
